# Supplementary material for: The photoluminescence and gas sorption properties of three Cd(ii) MOFs based on 1,3,5-benzenetribenzoate with –NH2 or –OH groups
Source: Royal Society of Chemistry journal article supplement (doi:10.1039/c3dt52940a), 2013-12-06
Supplement: c3dt52940a.pdf [file c3dt52940a.pdf]

## Electronic Supplementary Information

### **Photoluminescence and Gas Sorption Properties of Three Cd(II) MOFs based on 1,3,5-benzenetribenzoate with –NH<sub>2</sub> or –OH groups**

Hong-Ru Fu, Fei Wang and Jian Zhang\*

*State Key Laboratory of Structural Chemistry  
Fujian Institute of Research on the Structure of Matter  
Chinese Academy of Sciences  
Fuzhou  
Fujian 350002  
P. R. China.*

*\* Corresponding Author  
E-mail: [zhj@fjirsm.ac.cn](mailto:zhj@fjirsm.ac.cn)  
Fax: +86-591-83715030  
Tel: +86-591-83715030*

## General methods

Commercially available reagents were purchased used without further purification. 1,3,5-(tri-benzoic acid)aniline and 1,3,5-(tri-benzoic acid) phenol) were synthesized via suzuki reaction

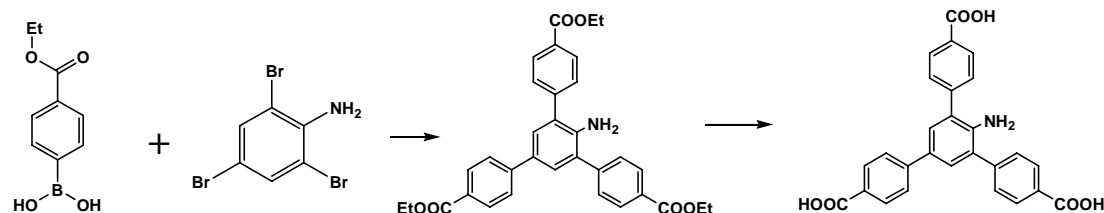

A mixture of 2,4,6-Tribromoaniline (2.5 g, 7.5 mmol), p-ethoxycarbonylphenyl boronic acid (6 g, 30.0 mmol),  $\text{Na}_2\text{CO}_3$  (4.0 g, 40 mmol), and  $\text{Pd}(\text{PPh}_3)_4$  (0.7 g, 0.5 mmol) was added into degassed toluene–methanol–water (80/40/40 mL) under an argon atmosphere. The resulting reaction mixture was stirred for 24 h under reflux. After removal of the solvent, the residue was extracted with dichloromethane (80×3 mL), washed with brine (80 mL), dried over anhydrous  $\text{MgSO}_4$  and concentrated in vacuum. The residue was purified by silica gel column chromatography (petroleumether/dichloromethane/4/1/5) to give 1,3,5-tri(p-methoxycarbonyl-phenyl)aniline (2.56 g, 73%), which was hydrolyzed with 6 M NaOH to afford the title compound.  $^1\text{H}$  NMR (DMSO- $d_6$ , 400 MHz)  $\delta$  (ppm): 13.04 (s, 3H), 8.10 (s, 3H), 8.06 (s, 12H);  $^{13}\text{C}$  NMR (DMSO- $d_6$ , 150 MHz)  $\delta$  (ppm): 167.11, 143.81, 140.72, 130.02, 129.88, 127.39, 125.54; FT-IR (KBr,  $\text{cm}^{-1}$ ): 3382, 3014, 2660, 2538, 1697, 1608, 1569, 1512, 1447, 1416, 1393, 1317, 1286, 1241, 1181, 1016, 847, 764; MS (ESI) ( $m/z$ ) calcd for  $\text{C}_{27}\text{H}_{17}\text{O}_6$ : 451.1, found: 451.6.

## X-Ray Crystallography Supporting Information

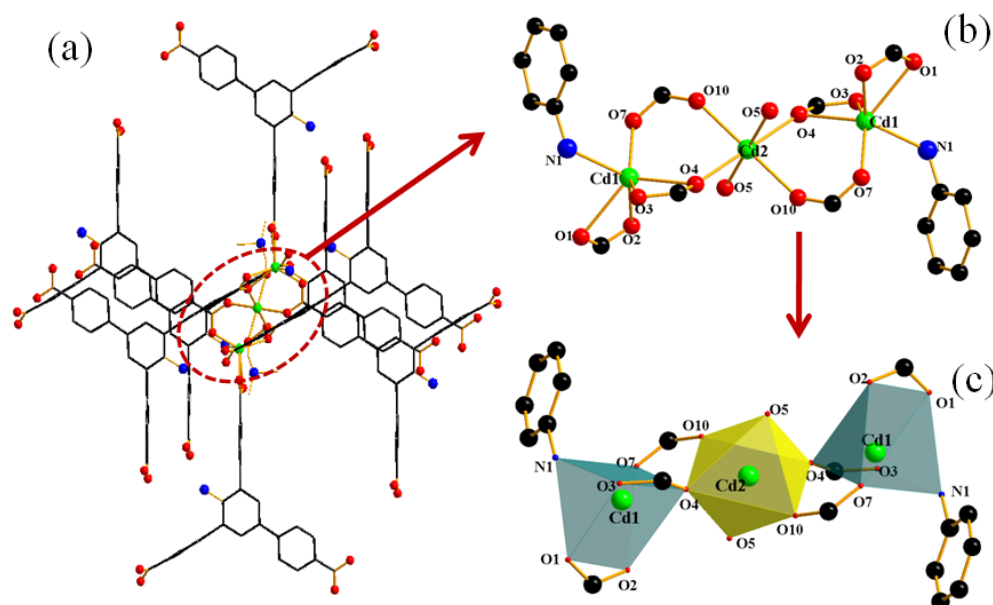

**Fig. S1** The coordination environment of three nuclear cadmium in **3**: (a) the wire style of three nuclear cadmium and ligands; (b) the amine group of ligand coordinate the two cadmium ions; (c) the centrosymmetrical structure of the three nuclear cadmium, it can be simplified into one octahedron and two triangular prisms.

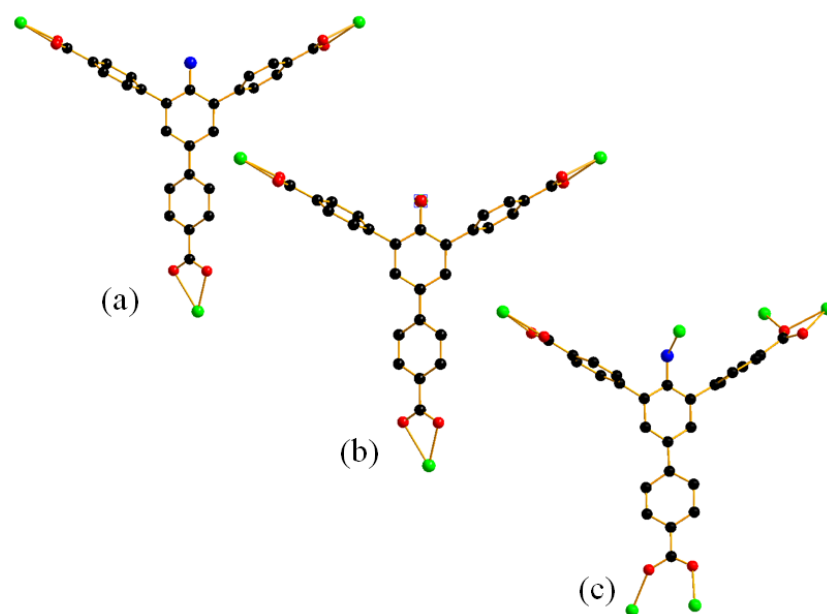

**Fig. S2** The coordination environment of the ligands: (a) in **1**; (a) in **2**; (a) in **3** (solvent molecules are shown as large blue spheres for clarity).

### Powder X-ray Diffraction Studies

X-ray powder diffraction (XPD) patterns of 1-3 were collected on a MiniFlex-II diffractometer X-ray powder diffraction (XPD) patterns of 1-3 were collected on a MiniFlex-II diffractometer

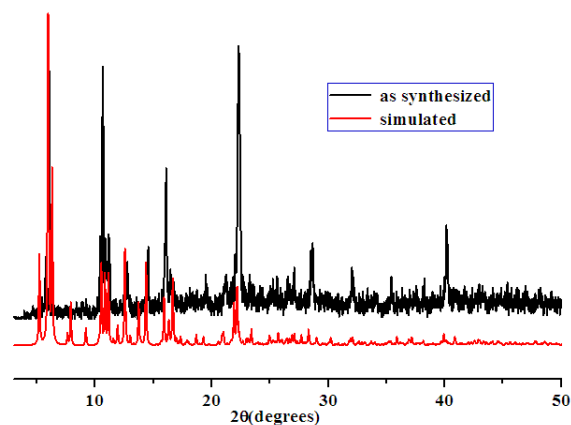

**Fig. S3** For **1**, comparison of XRPD patterns of the simulated pattern from the single-crystal structure determination and the as-synthesized product.

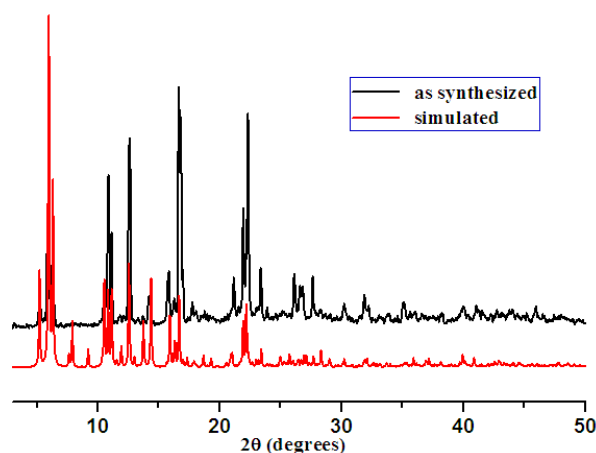

**Fig. S4** For **2**, comparison of XRPD patterns of the simulated pattern from the single-crystal structure determination and the as-synthesized product.

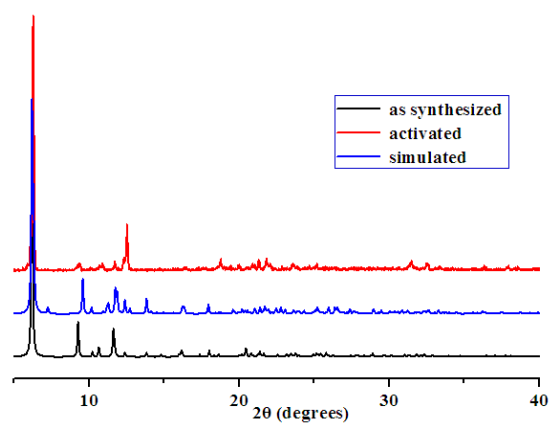

**Fig. S5** For **3**, comparison of XRPD patterns of the simulated pattern from the single-crystal structure determination and the as-synthesized product.

### Thermogravimetric Analysis of MOFs

Thermal Gravimetric Analysis (TGA) was carried out using a NETSCHZ STA-449C simultaneous TG-DSC thermoanalyzer, under a constant stream of dry nitrogen gas (flow rate 20 mL min<sup>-1</sup>) over the temperature range of 30 to 800 °C and at a heating rate of 10 °C min<sup>-1</sup>.

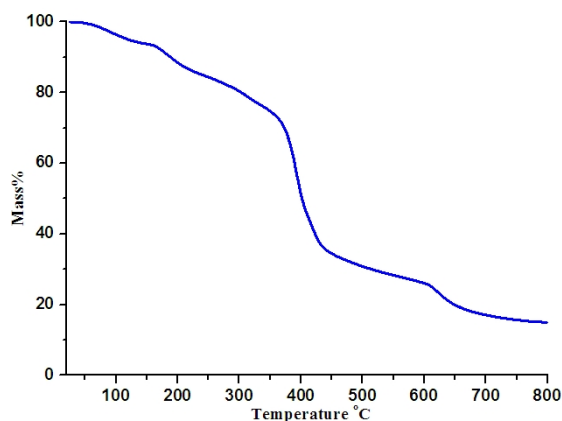

**Fig. S6** TGA curve of compound **1** under N<sub>2</sub> atmosphere.

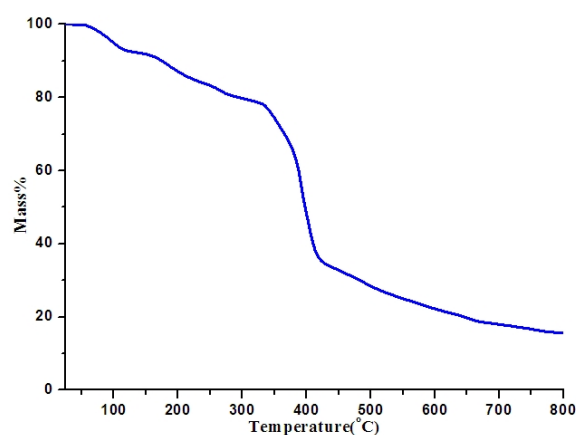

**Fig. S7** TGA curve of compound **2** under N<sub>2</sub> atmosphere.

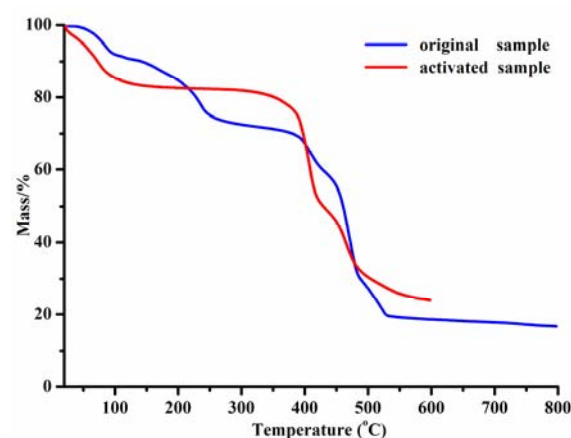

**Fig. S8** TGA curves of compound **3** under N<sub>2</sub> atmosphere.

The adsorption equilibrium selectivity  $\alpha_{12}$  between components 1 and 2 is defined as where component 1 is the stronger adsorbate and 2 is the weaker adsorbate.  $X_1$  and  $X_2$  are the molar fractions of components 1 and 2 on the adsorbent surface (or in the adsorbed phase),  $Y_1$  and  $Y_2$  are the molar fractions of components 1 and 2 in the gas phase.  $q_{m1}$  and  $q_{m2}$  and  $b_1$  and  $b_2$  are the Langmuir equation constants for components 1 and 2.  $K_1$  and  $K_2$  are the Henry's constants for components 1 and 2.

$$\alpha_{12} = \frac{X_1}{X_2} \cdot \frac{Y_2}{Y_1} = \frac{K_1}{K_2} = \frac{q_{m1}b_1}{q_{m2}b_2}$$
